# Supplementary material
Source: Springer Nature journal article supplement (https://www.springermedizin.de/resource/supplementary/12876_2013_1095_MOESM1_ESM.pdf/9438424)
Supplement: MOESM1 [file 9438424]

59 patients diagnosed with CD

11 patients switched to steroids

48 patients achieved remission via EEN

29 EEN via oral

19 EEN via NGT

14 MEN via oral

1 MEN via NGT

In Remission

13/14

1/1

at 6/12

In Remission

8/14

1/1

at 1 year

(5 patients continued MEN)

(1 patient continued MEN)
